# Supplementary material for: Pesticides reduce tropical amphibian and reptile diversity in agricultural landscapes in Indonesia
Source: PeerJ. 2023 Mar 20;11:e15046. doi: 10.7717/peerj.15046 (PMC10035417; doi:10.7717/peerj.15046)
Supplement: Supplemental Information 2 [file peerj-11-15046-s002.xlsx]

## Sheet: Habitat_Descr
hab	can_cov	pest_use	llc	llt	nlog	suv	ntre	can_het
pf	94.9 (1.2)	0.0 (0.0)	72.5 (27.6)	2.1 (1.0)	6.2 (2.7)	408.7 (228.0)	11.5 (6.0)	2.5 (0.3)
sf	87.0 (2.2)	21.4 (56.7)	70.3 (20.9)	2.4 (0.7)	9.4 (3.8)	370.8 (252.3)	9.0 (4.0)	2.7 (0.5)
nsaf	77.8 (4.4)	81.4 (103.5)	37.3 (19.5)	1.7 (0.9)	6.3 (4.7)	289.5 (217.7)	3.9 (3.5)	3.1 (0.3)
psaf	66.0 (3.8)	145.0 (136.1)	29.0 (25.2)	1.0 (0.6)	6.7 (5.1)	240.9 (240.3)	2.7 (2.6)	2.6 (0.5)
oa	0.0 (0.0)	384.0 (411.0)	0.0 (0.0)	0.0 (0.0)	3.2 (1.6)	61.0 (24.9)	0.0 (0.0)	1.2 (0.0)

## Sheet: Amph_spr
amphibians	iucn_stat	specialist	hab	abd
Bufonidae
Duttaphrynus melanosticus	LC	N	AF, CP, HS	C
Ingerophrynus celebensis	LC	N	PF, SF, AF, CP, OA	C
Microhylidae
Kaloula pulchra	LC	N	PF	C
Oreophryne sp. 1	NE	N	PF, SF	R
Ranidae
Hylarana celebensis	LC	N	PF, SF	C
Dicroglossidae
Fejervarya limnocharis	LC	N	PF, SF, AF, CP, OA, RF	C
Limnonectes cf. arathooni	NE	Y	PF	R
Limnonectes cf. modestus	NE	N	PF, SF	R
Limnonectes cf. heinrichi	NE	Y	AF	R
Limnonectes sp. (medium 3)	NE	Y	PF	R

## Sheet: Rept_spr
reptiles	iucn_stat	specialist	hab	abd
Colubridae
Ahaetulla prasina	NE	N	SF, AF, CP	C
Boiga irregularis	NE	N	AF	C
Dendrelaphis pictus pictus	NE	N	AF, CP	C
Natricidae
Rhabdophis callistus	NE	N	SF	R
Lamprophiidae
Psammodynastes pulverulentus	NE	N	SF	C
pulverulentus
Xenopeltidae
Xenopeltis unicolor	NE	N	AF, CP	C
Agamidae
Bronchocela celebensis	NE	N	PF, SF,AF, CP	C
Gekkonidae
Cyrtodactylus jellesmae	NE	Y	SF, AF	R
Scincidae
Eutropis sp.	NE	N	SF, AF, CP, OA	C
Eutropis multifasciatus	NE	Y	CP, OA	C
Eutropis rudis	NE	N	PF, SF, AF, CP	C
Parvoscincus sp.	NE	?	PF, SF, AF, CP	?
Sphenomorphus cf. textus	NE	?	PF, AF, CP, OA	?
Sphenomorphus nigrilabris	NE	Y	PF, SF, AF, CP	?
Sphenomorphus cf. variegatus	NE	N	PF, SF, AF, OA	?

## Sheet: legend
Column Name	Description
hab	Habitat types
can_cov	Canopy Cover [%]
pest_use	Annual pesticide use [ml/plot]
llc	Leaf-litter cover [%]
llt	Leaf-litter thickness [cm]
nlog	No. logs
suv	Shrub Volume
ntre	No. trees
can_het	Canopy heterogeneity
amphibians	Amphibian taxonomy
reptiles	Reptile taxonomy
iucn_stat	Red List classifications follow the criteria of IUCN (IUCN 2019, http://www.iucnredlist.org): CE = Critically Endangered; E = Endangered; V = Vulnerable; NT = Near Threatened; LC = Least Concern; DD =Data Deficient; NE = not evaluated by the IUCN
specialist	Specialist [Y/N/?] = species considered a pristine-forest specialist/disturbance-tolerant species/not known
hab	Habitat encountered = habitat where we encountered the species during the three-year survey; abbreviations used: PF = Rainforest; SF = secondary forest; AF = Cacao agroforest; CP = Cacao plantation; OA = Open area; RF = Rice paddy
abd	Abundance was classified as C = commonly encountered; R = rare (as mentioned in the literature)
